# Supplementary material for: Levels of Prebeta‐1 High‐Density Lipoprotein Are a Strong Independent Positive Risk Factor for Coronary Heart Disease and Myocardial Infarction: A Meta‐Analysis
Source: PubMed Central journal article supplement — J Am Heart Assoc. 2021 Mar 17;10(7):e018381. doi: 10.1161/JAHA.120.018381 (PMC8174380; doi:10.1161/jaha.120.018381), 2021-03-17
Supplement: JAH3-10-e018381-s001.pdf [file JAH3-10-e018381-s001.pdf]

# **SUPPLEMENTAL MATERIAL**

**Table S1. Characteristics of all participants in cohort 1, in total, and based on tertiles of percent prebeta-1 HDL.**

|                             | All Participants<br>(n = 1258) | Prebeta-1 HDL<br>Tertiles |                         |                     | P-Value |
|-----------------------------|--------------------------------|---------------------------|-------------------------|---------------------|---------|
|                             |                                | <4.06%<br>(n = 419)       | 4.06-9.18%<br>(n = 419) | >9.18%<br>(n = 420) |         |
| Age (years)                 | 50.9 ± 17.0                    | 52.3 ± 17.2               | 51.2 ± 16.9             | 49.1 ± 16.7         | 0.020   |
| Sex, male %                 | 44.5                           | 37.1                      | 48.0                    | 48.3                | <0.001  |
| BMI (kg/m <sup>2</sup> )    | 26.6 ± 5.4                     | 25.2 ± 4.9                | 27.2 ± 5.8              | 27.3 ± 5.1          | <0.001  |
| Ethnicity %:                |                                |                           |                         |                     |         |
| Caucasian                   | 73.8                           | 70.2                      | 74.3                    | 76.8                | 0.094   |
| East Asian                  | 13.6                           | 19.0                      | 11.4                    | 10.4                | <0.001  |
| Hispanic                    | 4.7                            | 4.3                       | 5.0                     | 4.7                 | 0.884   |
| African American            | 2.5                            | 2.6                       | 3.1                     | 1.7                 | 0.390   |
| Mixed, other                | 5.5                            | 3.8                       | 6.2                     | 6.4                 | 0.186   |
| CHD %                       | 36.8                           | 30.4                      | 38.7                    | 41.2                | 0.003   |
| MI %                        | 16.9                           | 13.3                      | 16.4                    | 21.1                | 0.010   |
| Diabetes %                  | 8.4                            | 7.6                       | 6.9                     | 10.7                | 0.110   |
| Hypertension %              | 33.8                           | 29.8                      | 33.5                    | 38.2                | 0.036   |
| Smoker (current) %          | 6.6                            | 4.0                       | 5.9                     | 10.0                | 0.002   |
| Triglycerides (mg/dl)       | 148 (59)                       | 110 (38.5)                | 150 (52)                | 199 (99)            | <0.001  |
| LDL cholesterol (mg/dl)     | 148 ± 59                       | 147 ± 54                  | 149 ± 56                | 148 ± 66            | 0.557   |
| HDL cholesterol (mg/dl)     | 50.7 ± 18.1                    | 58.3 ± 19.8               | 48.4 ± 16.8             | 45.5 ± 14.6         | <0.001  |
| Apolipoprotein A-I (mg/dl)  | 118 ± 35                       | 122 ± 35                  | 115 ± 38                | 114 ± 31            | 0.002   |
| Lipid-lowering medication % | 15.6                           | 16.4                      | 14.7                    | 15.6                | 0.801   |

BMI: body mass index; CHD: coronary heart disease; MI: myocardial infarction; LDL: low density lipoprotein; HDL: high density lipoprotein. For continuous variables differences between the tertile groups were tested by ANOVA, and for categorical variables by Chi squared test. Prior to testing skewed variables (Triglycerides, LDL cholesterol, HDL cholesterol, and BMI) were log transformed. Data are presented as number of individual participants (percentage), and mean ± SD, or median (median absolute deviation). CHD, coronary heart disease. MI, myocardial infarction.
